# Supplementary material for: Gas–solid reaction for in situ deposition of Cu3SbS4 on a mesoporous TiO2 film
Source: Royal Society of Chemistry journal article supplement (doi:10.1039/c7ra08137e), 2017-01-01
Supplement: c7ra08137e1.pdf [file c7ra08137e1.pdf]

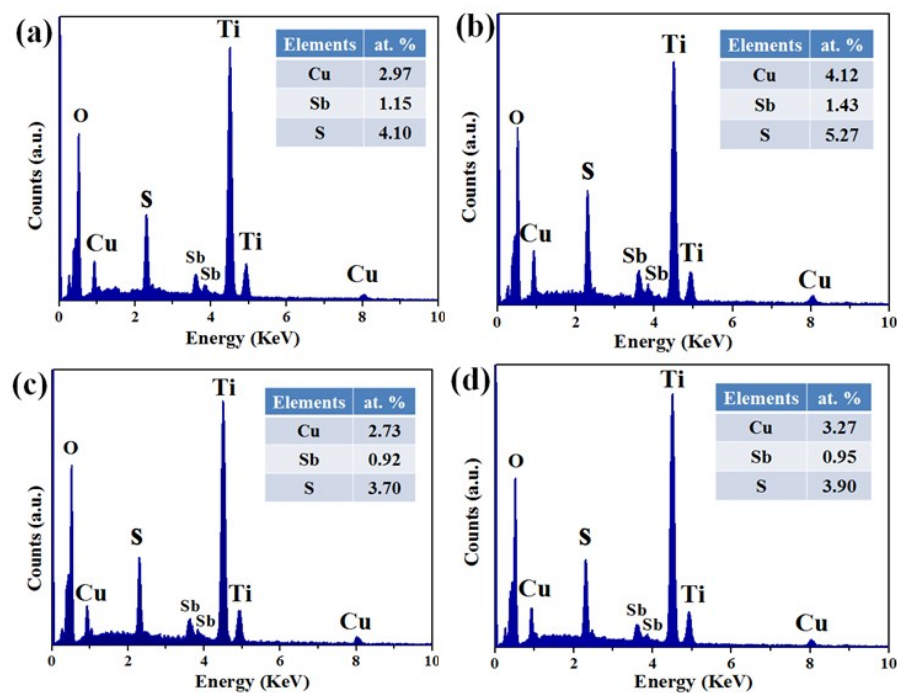

**Fig. S1** X-Ray Energy Dispersive Spectrometer (EDS) spectra and elemental composition of  $\text{Cu}_3\text{SbS}_4$  film prepared by various precursor ratio of 2:1, 2.3:1, 2.5:1 and 3:1.

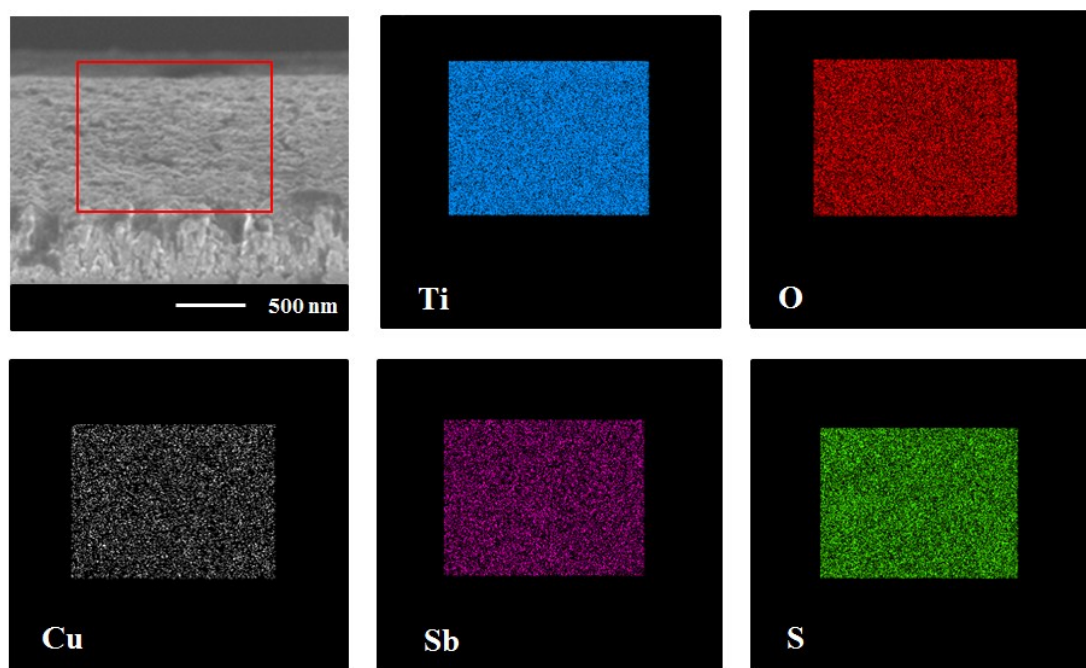

**Fig. S2** X-Ray Energy Dispersive Spectrometer (EDS) mapping images of cross sectional  $\text{Cu}_3\text{SbS}_4$  film prepared as a precursor ratio of 2.5:1 and heat treatment in  $\text{H}_2\text{S}$  at  $300^\circ\text{C}$ .

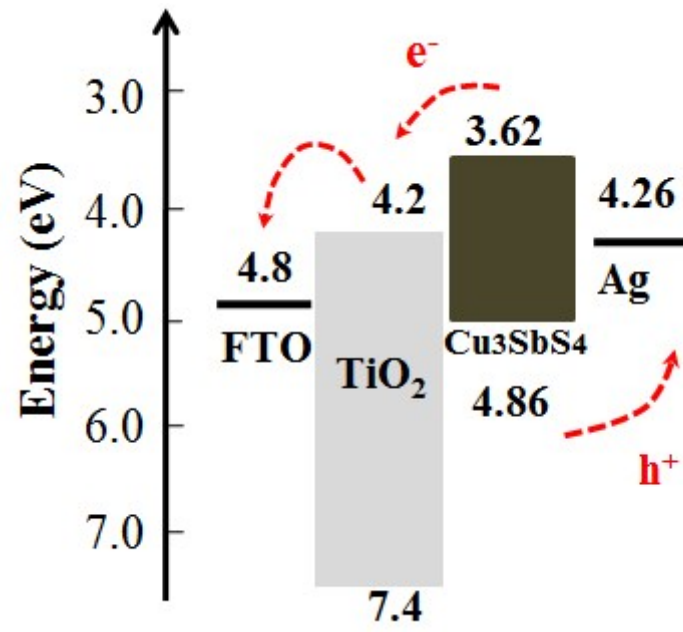

**Fig. S3** The band alignment diagrams of TiO<sub>2</sub>/Cu<sub>3</sub>SbS<sub>4</sub> film
